# Supplementary material for: Molecularly imprinted polymers fabricated by Pickering emulsion polymerization for the selective adsorption and separation of quercetin from Spina Gleditsiae
Source: Royal Society of Chemistry journal article supplement (doi:10.1039/c9nj03559a), 2019-01-01
Supplement: c9nj03559a1.pdf [file c9nj03559a1.pdf]

Molecularly imprinted polymers fabricated by Pickering emulsion polymerization for  
the selective adsorption and separation of quercetin from *Spina Gleditsiae*

Yanhua Sun<sup>a</sup>, Yange Zhang<sup>a</sup>, Zhiyu Ju<sup>a</sup>, Liangfeng Niu<sup>a</sup>, Zhaoxiang Gong<sup>a</sup>, Zhihong Xu<sup>ab\*</sup>

<sup>a</sup> Key Laboratory of Chemo/Biosensing and Detection, School of Chemistry and Chemical Engineering,  
Xuchang University, Xuchang, 461000, P. R. China

<sup>b</sup> College of Chemistry and Molecular Engineering, Zhengzhou University, Zhengzhou, 450052, P.R.  
China

\*Correspondence: Prof. Zhihong Xu, School of Chemistry and Chemical Engineering, Xuchang  
University, Xuchang 461000, China

Email address: xuzhihong1980@xcu.edu.cn (Z. Xu)

Tel: +86 0374-4369297

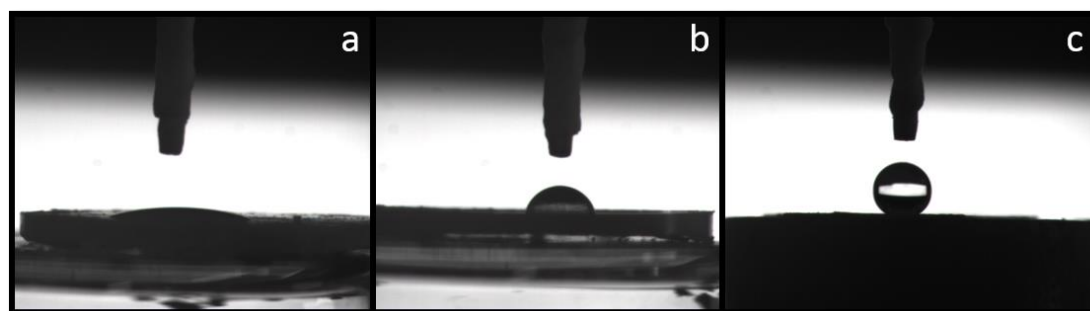

Fig. S1 The contact angle test of HAp (a), M<sub>5</sub>-HAp (b), and M<sub>10</sub>-HAp (c)

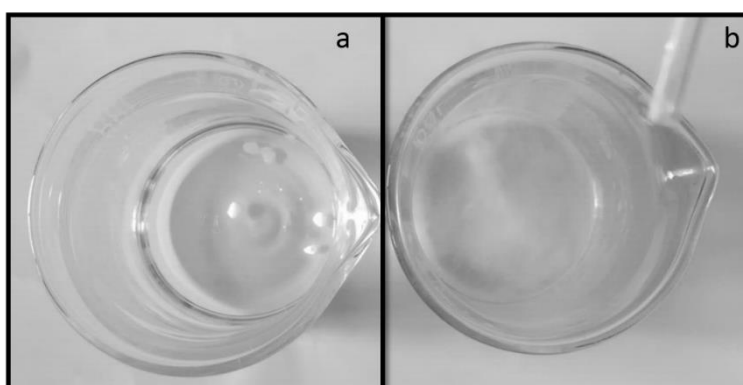

Fig. S2 The photograph of emulsion dropped into toluene (a) and pure water (b)

Table S1 The linear fitting results of pseudo-first-order and pseudo-second-order models for MIPs-X and NIPs-8

| Adsorbents | $Q_{e,exp}$ ( $\mu\text{g g}^{-1}$ ) | Pseudo-first-order                 |       |       | Pseudo-second-order                |                             |       |
|------------|--------------------------------------|------------------------------------|-------|-------|------------------------------------|-----------------------------|-------|
|            |                                      | $Q_{e,c}$ ( $\mu\text{g g}^{-1}$ ) | $k_1$ | $R^2$ | $Q_{e,c}$ ( $\mu\text{g g}^{-1}$ ) | $k_2$ ( $\text{min}^{-1}$ ) | $R^2$ |

|         |     |     |         |        |     |                      |        |
|---------|-----|-----|---------|--------|-----|----------------------|--------|
| MIPs-4  | 338 | 380 | 0.0727  | 0.9991 | 442 | $377 \times 10^{-6}$ | 0.9594 |
| MIPs-6  | 451 | 501 | 0.06958 | 0.9993 | 592 | $118 \times 10^{-6}$ | 0.9618 |
| MIPs-8  | 521 | 573 | 0.06864 | 0.9989 | 685 | $87 \times 10^{-6}$  | 0.9609 |
| MIPs-10 | 465 | 395 | 0.04756 | 0.9907 | 606 | $74 \times 10^{-6}$  | 0.9701 |
| MIPs-12 | 415 | 348 | 0.04303 | 0.9892 | 552 | $8 \times 10^{-6}$   | 0.9723 |
| NIPs-8  | 119 | 98  | 0.04767 | 0.9910 | 150 | $8 \times 10^{-6}$   | 0.9844 |

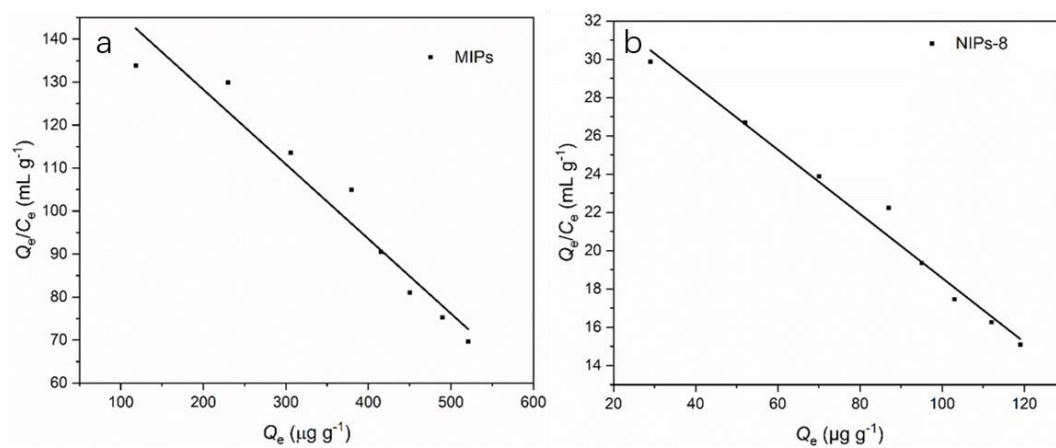

Fig. S3 The linear fitting curves of Scatchard model for MIPs-8 and NIPs-8 toward quercetin at 40 °C

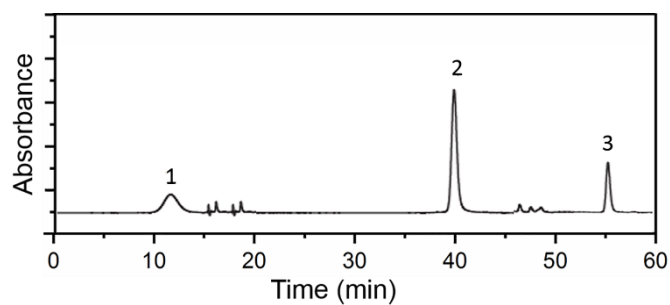

Fig. S4 Chromatograms of the eluate from MIPs-8 which immersed in Spina Gleditsiae extracting solution
